# Supplementary material for: Facile fabrication of graphitic carbon nitride/polydopamine/polyurethane foam as a floating photocatalyst for synthetic dye remediation
Source: Royal Society of Chemistry journal article supplement (doi:10.1039/d4re00193a), 2024-01-01
Supplement: d4re00193a1.pdf [file d4re00193a1.pdf]

## Supplementary Material (ESI)

# **Facile Fabrication of Graphitic Carbon Nitride/Polydopamine/Polyurethane Foam as Floating Photocatalyst for Synthetic Dye Remediation**

Indra J. Budiarmo<sup>a</sup>, Shusaku Fujita<sup>b</sup>, Shota Saito<sup>c</sup>, Hermawan Judawisastra<sup>c</sup>, Kotaro Takeyasu<sup>d,e</sup>, and Arie Wibowo<sup>c,f,\*</sup>

<sup>a</sup>Master Program in Materials Science and Engineering, Faculty of Mechanical and Aerospace Engineering, Institut Teknologi Bandung, Jl. Ganesha 10, Bandung 40132, West Java, Indonesia.

<sup>b</sup>Graduate school of Science and Technology, University of Tsukuba 1-1-1 Tennodai, Tsukuba, Ibaraki, 305-8573, Japan

<sup>c</sup>Materials Science and Engineering Research Group, Faculty of Mechanical and Aerospace Engineering, Institut Teknologi Bandung, Jl. Ganesha 10, Bandung 40132, West Java, Indonesia.

<sup>d</sup>Faculty of Pure and Applied Sciences, University of Tsukuba 1-1-1 Tennodai, Tsukuba, Ibaraki 305-8573, Japan.

<sup>e</sup>Institute for Catalysis, Hokkaido University, Kita21, Nishi10, Kita-ku, Sapporo, Hokkaido 001-0021, Japan.

<sup>f</sup>Research Center for Nanoscience and Nanotechnology, Institut Teknologi Bandung, Ganesha 10, Bandung 40132, West Java, Indonesia

E-mail: [ariewibowo@itb.ac.id](mailto:ariewibowo@itb.ac.id)

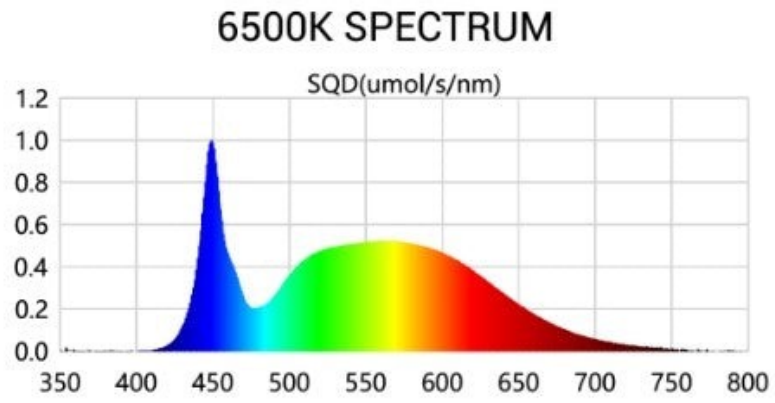

Figure S1. Spectrum of LED light with 6500K color.<sup>1</sup>

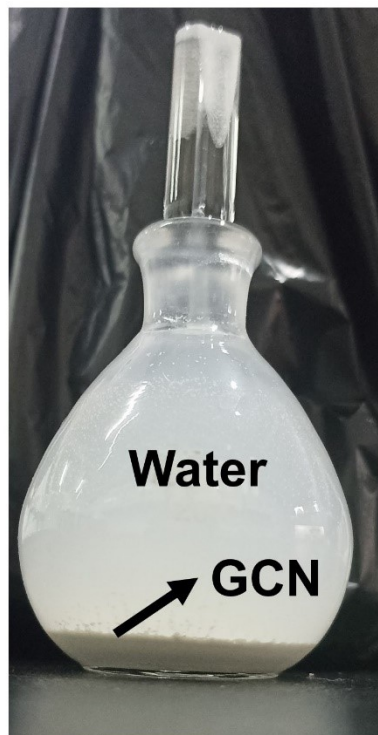

Figure S2. GCN sink in water

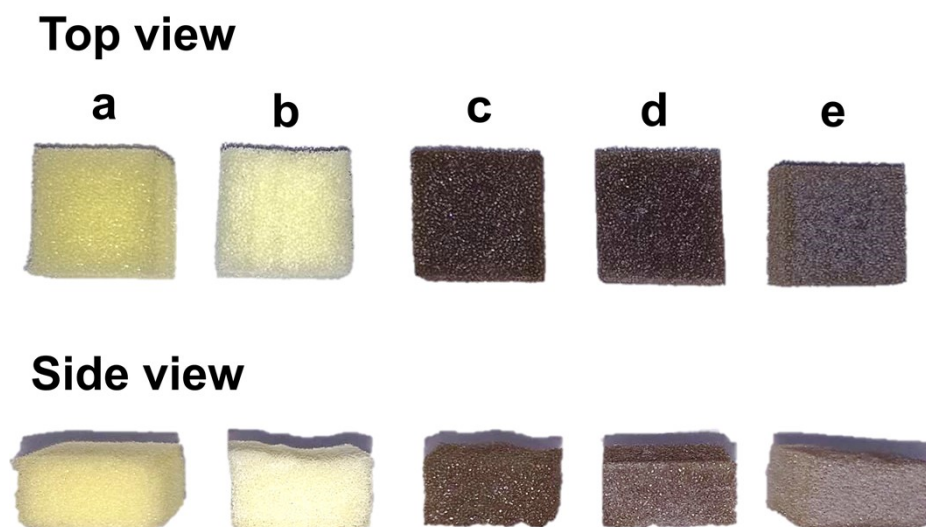

Figure S3. Top and side visual image of (a) PUF, (b) PUF/GCN, (c) PUF/PDA, (d) PUF/PDA/GCN-2, and (e) PUF/PDA/GCN-1.

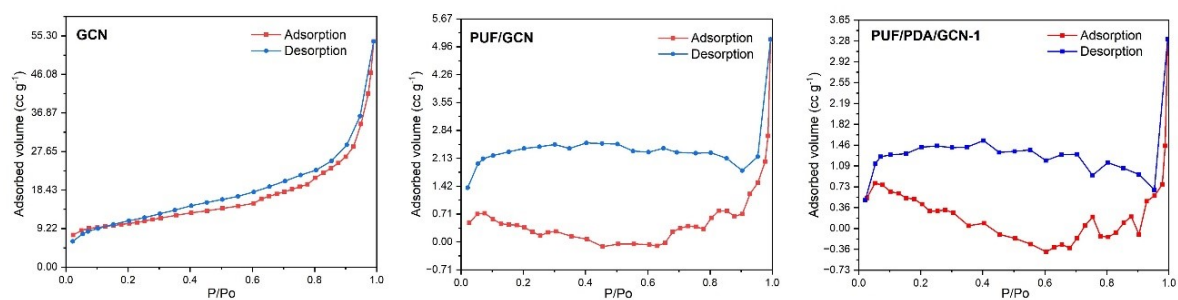

Figure S4. Adsorption-desorption spectra of GCN, PUF/GCN and PUF/PDA/GCN-1

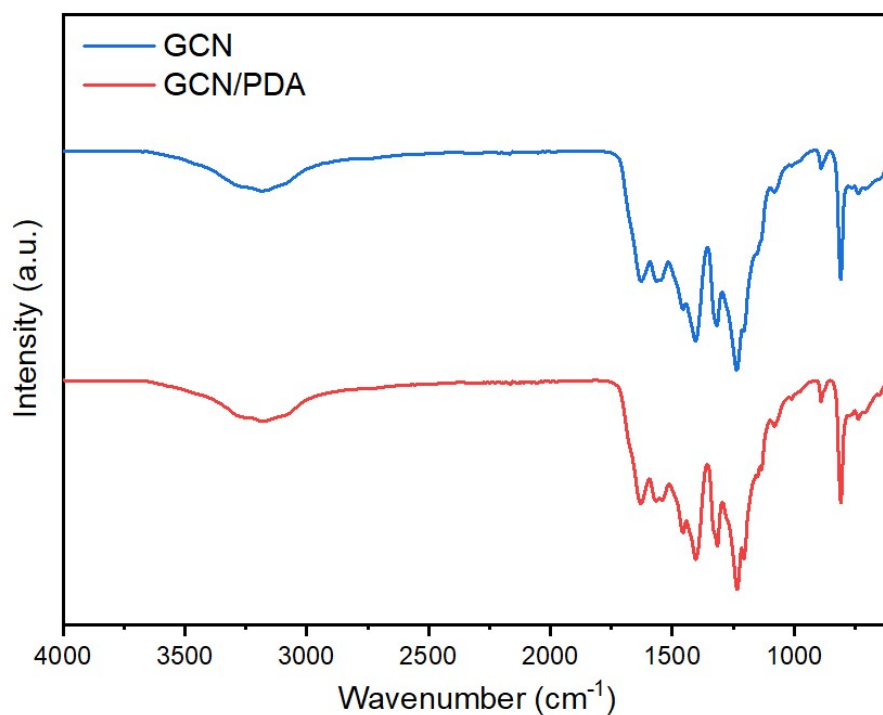

Figure S5. FTIR spectra of GCN and GCN/PDA.

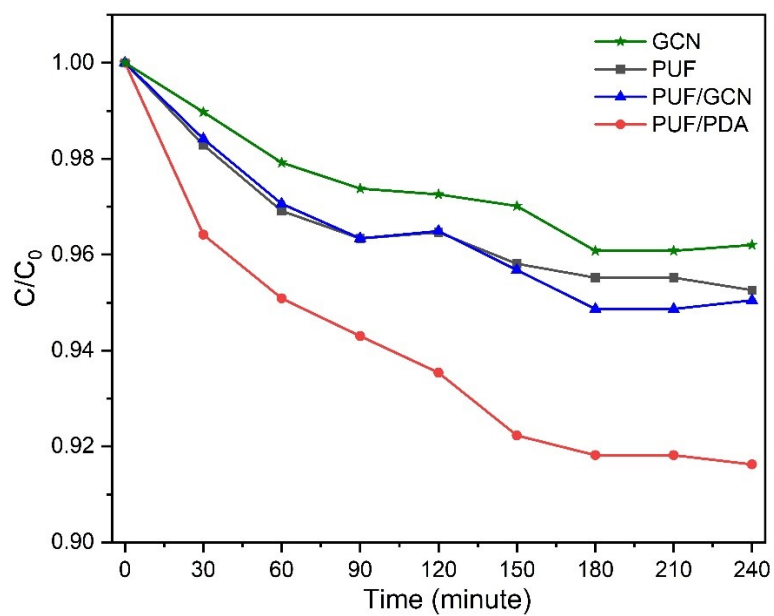

Figure S6. PUF and PUF/PDA adsorption spectra

## References

- 1 6500K vs 2700K; what does the kelvin number actually mean? - The 2Hr Aquarist, <https://www.2hraquarist.com/blogs/light-3pillars/k-rating>, (accessed 4 February 2024).
